# Supplementary material for: Mechanistic elucidation of O2 production from tBuOOH in water using the Mn(ii) catalyst [Mn2(mcbpen)2(H2O)2]2+: a DFT study
Source: Royal Society of Chemistry journal article supplement (doi:10.1039/d4dt01700e), 2024-01-01
Supplement: d4dt01700e1.pdf [file d4dt01700e1.pdf]

**Supporting Information for:**

**Mechanistic elucidation of O<sub>2</sub> production from <sup>t</sup>BuOOH in water using [Mn<sub>2</sub>(mcbpen)<sub>2</sub>(H<sub>2</sub>O)<sub>2</sub>]<sup>2+</sup> (Mn(II)) as the catalyst: a DFT study**

*Alireza Ariafard,<sup>\*a</sup> Matthew Longhurst,<sup>b</sup> Gerhard F. Swiegers,<sup>b</sup> Robert Stranger<sup>\*a</sup>*

<sup>a</sup> Research School of Chemistry, Australian National University, Canberra, Australia

<sup>b</sup> Intelligent Polymer Research Institute, University of Wollongong, Wollongong, Australia

**Table of contents:**

**Fig. S1** Spatial plots of two lone pair orbitals with p character for (a) α-spin and (b) β-spin electrons on the oxygen ligand in [Mn<sup>IV</sup>(<sup>18</sup>O)(mcbpen)]<sup>+</sup> (complex **3**), as determined by NLMO calculations (page S2).

**Table S1.** Cartesian coordinates of all structures optimized at the SMD/B3LYP-D3/6-31G(d),SDD level of theory in water (page S3).

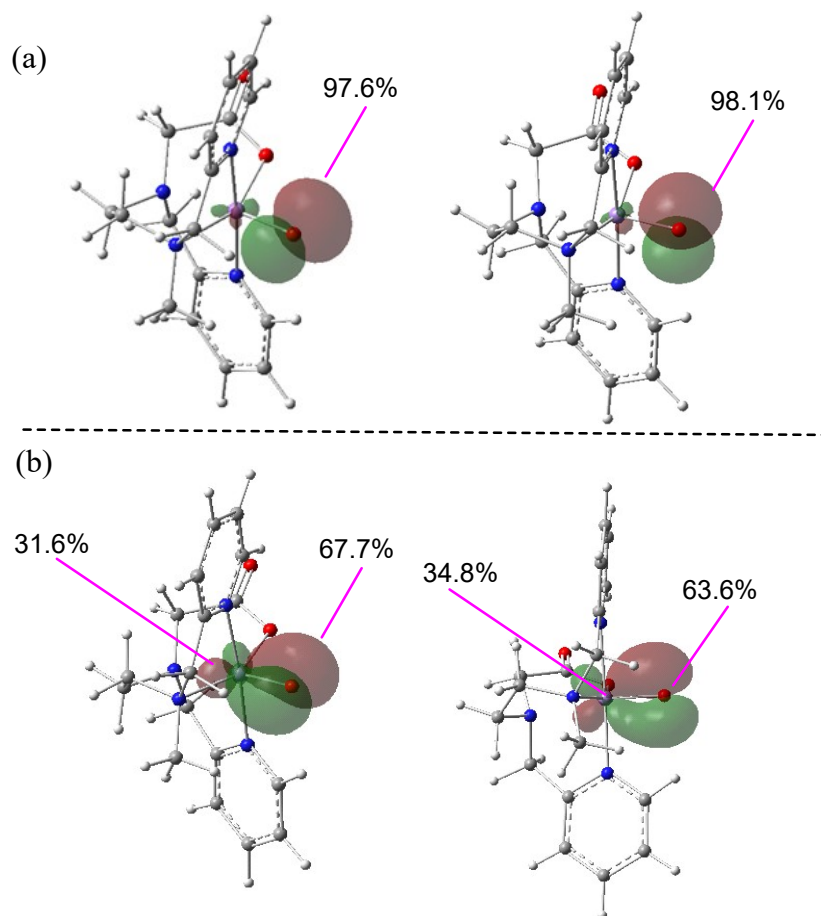

**Fig. S1** Spatial plots of two lone pair orbitals with p character for (a)  $\alpha$ -spin and (b)  $\beta$ -spin electrons on the oxygen ligand in  $[\text{Mn}^{\text{IV}}(^{18}\text{O})(\text{mcbpen})]^+$  (complex **3**), as determined by NLMO calculations.

**Table S1.** Cartesian coordinates of all structures optimized at the SMD/B3LYP-D3/6-31G(d),SDD level of theory in water.

**4**

|    |             |             |             |
|----|-------------|-------------|-------------|
| Mn | 0.98800600  | 0.94389800  | -0.00317400 |
| O  | 0.82598600  | -0.81645400 | 0.22510200  |
| N  | 1.03259000  | 1.54729200  | 2.00146000  |
| N  | 3.12538800  | 0.84590500  | 0.28791000  |
| N  | 5.79061800  | -0.52007200 | -1.03807200 |
| N  | 0.60330600  | 3.04078500  | -0.12647600 |
| C  | 2.37702700  | 2.20558300  | 2.18839300  |
| H  | 2.37852100  | 3.15194900  | 1.64724000  |
| H  | 2.51687800  | 2.42312900  | 3.25243800  |
| C  | 3.46903000  | 1.29540300  | 1.67331500  |
| H  | 3.55665500  | 0.41170600  | 2.30343200  |
| H  | 4.43467900  | 1.80888200  | 1.67908200  |
| C  | 3.61122000  | 1.77700400  | -0.76128500 |
| H  | 3.40761700  | 2.80659800  | -0.45042600 |
| H  | 4.68335100  | 1.67467000  | -0.93330300 |
| C  | 3.60234100  | -0.56372200 | 0.03334400  |
| H  | 3.10875500  | -1.19090800 | 0.77435200  |
| H  | 3.23839600  | -0.85542000 | -0.95267100 |
| C  | 5.10388100  | -0.73793200 | 0.10102800  |
| C  | 5.72620700  | -1.13111500 | 1.29085600  |
| H  | 5.13201000  | -1.31949300 | 2.17925000  |
| C  | 7.11214800  | -1.28678000 | 1.31132900  |
| H  | 7.61835600  | -1.59243300 | 2.22216800  |
| C  | 7.82884600  | -1.04925100 | 0.13969900  |
| H  | 8.90784500  | -1.15932000 | 0.10320800  |
| C  | 7.12253000  | -0.67213000 | -1.00307100 |
| H  | 7.64931600  | -0.48949800 | -1.93688400 |
| C  | 0.66370800  | 3.81009300  | -1.22901400 |
| H  | 1.12578900  | 3.37443000  | -2.10476800 |
| C  | 0.15043700  | 5.10042200  | -1.25113400 |
| H  | 0.22260600  | 5.68919000  | -2.15851900 |
| C  | -0.44808100 | 5.60649000  | -0.09621700 |
| H  | -0.85480400 | 6.61254700  | -0.08174500 |
| C  | -0.51378400 | 4.80550500  | 1.04299700  |
| H  | -0.96574400 | 5.16202200  | 1.96214700  |
| C  | 0.01510900  | 3.52083100  | 0.99140800  |
| C  | -0.04672500 | 2.56261500  | 2.14657700  |
| H  | -1.00456400 | 2.03491500  | 2.13813300  |
| H  | 0.05729000  | 3.08185100  | 3.10574400  |
| C  | 0.84756900  | 0.45409000  | 2.99148900  |

|    |             |             |             |
|----|-------------|-------------|-------------|
| H  | -0.14721100 | 0.03616000  | 2.87360400  |
| H  | 1.58293600  | -0.32958700 | 2.81604000  |
| H  | 0.97229100  | 0.86349300  | 4.00029200  |
| C  | 2.82524800  | 1.50863300  | -2.03390100 |
| O  | 3.25735200  | 1.76140300  | -3.15139700 |
| O  | 1.61379000  | 1.02339400  | -1.83045800 |
| O  | -0.82538900 | 0.81585500  | -0.22701800 |
| Mn | -0.98773700 | -0.94411800 | 0.00292000  |
| N  | -1.03084800 | -1.55179400 | -2.00009600 |
| N  | -3.12481300 | -0.84537400 | -0.28967700 |
| N  | -5.79065200 | 0.52369100  | 1.03198700  |
| N  | -0.60456100 | -3.04101800 | 0.13146400  |
| C  | -2.37580000 | -2.20911500 | -2.18699300 |
| H  | -2.37854900 | -3.15446500 | -1.64406800 |
| H  | -2.51487600 | -2.42853300 | -3.25075900 |
| C  | -3.46745000 | -1.29699300 | -1.67464500 |
| H  | -3.55347700 | -0.41432500 | -2.30643900 |
| H  | -4.43359000 | -1.80954900 | -1.68054300 |
| C  | -3.61188300 | -1.77445900 | 0.76073200  |
| H  | -3.40855400 | -2.80471600 | 0.45188400  |
| H  | -4.68409000 | -1.67131600 | 0.93178300  |
| C  | -3.60152800 | 0.56484100  | -0.03780300 |
| H  | -3.10718500 | 1.19066500  | -0.77945100 |
| H  | -3.23825600 | 0.85806000  | 0.94800200  |
| C  | -5.10297000 | 0.73936900  | -0.10696000 |
| C  | -5.72426600 | 1.13066900  | -1.29794100 |
| H  | -5.12932800 | 1.31731200  | -2.18620100 |
| C  | -7.11014500 | 1.28671500  | -1.31974700 |
| H  | -7.61556700 | 1.59093300  | -2.23150300 |
| C  | -7.82781700 | 1.05143300  | -0.14826100 |
| H  | -8.90681000 | 1.16188200  | -0.11279400 |
| C  | -7.12249200 | 0.67607700  | 0.99570100  |
| H  | -7.65004400 | 0.49519700  | 1.92942300  |
| C  | -0.66621300 | -3.80771900 | 1.23575100  |
| H  | -1.12835700 | -3.36963300 | 2.11026400  |
| C  | -0.15409100 | -5.09844300 | 1.26114200  |
| H  | -0.22723900 | -5.68501700 | 2.16986700  |
| C  | 0.44453100  | -5.60775200 | 0.10770800  |
| H  | 0.85032900  | -6.61421400 | 0.09577800  |
| C  | 0.51157100  | -4.80946500 | -1.03331700 |
| H  | 0.96370800  | -5.16852300 | -1.95138700 |
| C  | -0.01613500 | -3.52417300 | -0.98497200 |
| C  | 0.04746400  | -2.56859600 | -2.14224800 |

|   |             |             |             |
|---|-------------|-------------|-------------|
| H | 1.00587500  | -2.04194200 | -2.13436100 |
| H | -0.05653700 | -3.08984200 | -3.10032200 |
| C | -0.84354400 | -0.46049600 | -2.99177800 |
| H | 0.15155000  | -0.04340900 | -2.87339400 |
| H | -1.57821500 | 0.32431100  | -2.81847100 |
| H | -0.96753200 | -0.87140700 | -4.00005300 |
| C | -2.82671300 | -1.50399900 | 2.03340800  |
| O | -3.25963100 | -1.75462700 | 3.15107300  |
| O | -1.61504300 | -1.01939000 | 1.82985400  |

**15**

|    |             |             |             |
|----|-------------|-------------|-------------|
| Mn | 1.28402700  | -0.00144400 | 0.14851700  |
| O  | -0.43523600 | 0.21633700  | -0.12748600 |
| N  | 1.34276400  | 1.17725500  | 1.84741500  |
| N  | 3.37751600  | -0.02783400 | 0.35818800  |
| N  | 6.23411500  | 1.43025800  | -0.35163300 |
| N  | 0.63773700  | -1.36766200 | 1.68571400  |
| C  | 2.61871500  | 0.80198700  | 2.55394100  |
| H  | 2.47238100  | -0.17369400 | 3.01810700  |
| H  | 2.81482400  | 1.53002800  | 3.34787600  |
| C  | 3.77348700  | 0.75259500  | 1.57502500  |
| H  | 4.04794100  | 1.75331600  | 1.24570300  |
| H  | 4.65208000  | 0.30242600  | 2.04502300  |
| C  | 3.63605000  | -1.48731500 | 0.45928400  |
| H  | 3.28973500  | -1.84615400 | 1.43280000  |
| H  | 4.69831400  | -1.72318300 | 0.37128400  |
| C  | 4.02574600  | 0.54295600  | -0.88453700 |
| H  | 3.72887000  | 1.59055400  | -0.93583100 |
| H  | 3.59418100  | 0.02251500  | -1.73969800 |
| C  | 5.53311600  | 0.42794700  | -0.91481700 |
| C  | 6.14473500  | -0.67135600 | -1.52863700 |
| H  | 5.53364300  | -1.45183400 | -1.97252900 |
| C  | 7.53730900  | -0.74613400 | -1.54987100 |
| H  | 8.03706300  | -1.58846900 | -2.01878600 |
| C  | 8.26899100  | 0.28440100  | -0.96195500 |
| H  | 9.35419600  | 0.27595600  | -0.95528100 |
| C  | 7.57206300  | 1.34447700  | -0.37995800 |
| H  | 8.11397300  | 2.16765100  | 0.08007700  |
| C  | 0.49677400  | -2.70220300 | 1.58702400  |
| H  | 0.98644600  | -3.18632000 | 0.75278800  |
| C  | -0.24887700 | -3.43422000 | 2.50213400  |
| H  | -0.33847700 | -4.50786300 | 2.38217600  |
| C  | -0.86937200 | -2.76058800 | 3.55607000  |

|    |             |             |             |
|----|-------------|-------------|-------------|
| H  | -1.45839400 | -3.30353100 | 4.28831100  |
| C  | -0.72013000 | -1.37872600 | 3.65926900  |
| H  | -1.18279000 | -0.81552900 | 4.46240900  |
| C  | 0.03336200  | -0.71086600 | 2.69895700  |
| C  | 0.17665200  | 0.78412000  | 2.68549300  |
| H  | -0.72082300 | 1.22345900  | 2.24380200  |
| H  | 0.29734200  | 1.18480900  | 3.69820000  |
| C  | 1.28256900  | 2.63435600  | 1.56001100  |
| H  | 0.39043700  | 2.83816500  | 0.97179200  |
| H  | 2.16054500  | 2.93407500  | 0.99029100  |
| H  | 1.24432600  | 3.18708000  | 2.50528100  |
| C  | 2.82220500  | -2.17359000 | -0.63491300 |
| O  | 3.15739200  | -3.24270100 | -1.13321800 |
| O  | 1.71976100  | -1.53178400 | -0.96961300 |
| Mn | -2.23460100 | 0.17576700  | -0.29332600 |
| N  | -2.28192000 | 0.86675700  | -2.34205100 |
| N  | -4.26231300 | -0.12901000 | -0.58301700 |
| N  | -2.32527100 | -2.01103000 | -0.80335800 |
| N  | -2.15729500 | 2.55383700  | -0.20830800 |
| C  | -3.71897600 | 1.20646600  | -2.59691200 |
| H  | -3.92592500 | 2.16880400  | -2.12682800 |
| H  | -3.89054100 | 1.31081700  | -3.67437600 |
| C  | -4.61807100 | 0.13176600  | -2.02043800 |
| H  | -4.49346900 | -0.80819600 | -2.55989800 |
| H  | -5.67141500 | 0.42160100  | -2.08392000 |
| C  | -4.91400700 | 0.80681400  | 0.37410300  |
| H  | -4.86224000 | 1.82334400  | -0.02412900 |
| H  | -5.96530800 | 0.54120600  | 0.51761000  |
| C  | -4.61113900 | -1.53896500 | -0.21062800 |
| H  | -4.64966100 | -1.60135900 | 0.88063400  |
| H  | -5.60928200 | -1.77315100 | -0.59348800 |
| C  | -3.57217000 | -2.50758200 | -0.70653000 |
| C  | -3.85376800 | -3.84241100 | -0.98553400 |
| H  | -4.87173900 | -4.20909700 | -0.90809500 |
| C  | -2.80263300 | -4.68111900 | -1.35709400 |
| H  | -2.99181100 | -5.72760600 | -1.57519600 |
| C  | -1.51030700 | -4.15996300 | -1.45160900 |
| H  | -0.66855900 | -4.78036700 | -1.73904900 |
| C  | -1.31245800 | -2.81243300 | -1.17270500 |
| H  | -0.33617000 | -2.34848000 | -1.23945800 |
| C  | -2.28845000 | 3.36230200  | 0.85881000  |
| H  | -2.72865100 | 2.92250800  | 1.74641800  |
| C  | -1.88255500 | 4.69175200  | 0.84317300  |

|   |             |             |             |
|---|-------------|-------------|-------------|
| H | -2.00778500 | 5.30768500  | 1.72687500  |
| C | -1.31307900 | 5.20086000  | -0.32693000 |
| H | -0.98289500 | 6.23383300  | -0.37673800 |
| C | -1.17927400 | 4.36620200  | -1.43387900 |
| H | -0.74773200 | 4.72368000  | -2.36333400 |
| C | -1.61155600 | 3.04275600  | -1.33332500 |
| C | -1.43106200 | 2.07565200  | -2.47726500 |
| H | -0.38973100 | 1.74350700  | -2.48968400 |
| H | -1.64123600 | 2.56638700  | -3.43564000 |
| C | -1.78553700 | -0.17114500 | -3.28220700 |
| H | -0.78533000 | -0.47646100 | -2.96990400 |
| H | -2.44159700 | -1.03964300 | -3.26443500 |
| H | -1.75039400 | 0.23620000  | -4.29954600 |
| C | -4.14099700 | 0.76910900  | 1.69402300  |
| O | -4.65218900 | 1.16316900  | 2.74125500  |
| O | -2.91254800 | 0.33133900  | 1.59249200  |
| O | 1.40763800  | 1.29587100  | -1.02186500 |

<sup>35</sup>

|    |             |             |             |
|----|-------------|-------------|-------------|
| Mn | 1.24883600  | 0.22107500  | 0.04833400  |
| O  | -0.48668200 | 0.25205000  | -0.07956200 |
| N  | 1.39486600  | 1.16112700  | 1.88826400  |
| N  | 3.39415700  | 0.05624500  | 0.21720400  |
| N  | 6.34885800  | 1.30148000  | -0.38854000 |
| N  | 0.72037200  | -1.36631300 | 1.55079400  |
| C  | 2.69684300  | 0.70098400  | 2.49832200  |
| H  | 2.55135600  | -0.30903900 | 2.87875000  |
| H  | 2.92970500  | 1.35412300  | 3.34562500  |
| C  | 3.82047400  | 0.72691500  | 1.48273100  |
| H  | 4.08844700  | 1.75124200  | 1.22835100  |
| H  | 4.70809400  | 0.24120800  | 1.89813500  |
| C  | 3.56621100  | -1.41367700 | 0.18804900  |
| H  | 3.23602000  | -1.84141000 | 1.13767700  |
| H  | 4.60566100  | -1.70974500 | 0.03295800  |
| C  | 4.06708800  | 0.68239700  | -0.98037600 |
| H  | 3.86422900  | 1.74927400  | -0.93205200 |
| H  | 3.57447300  | 0.28577700  | -1.87004100 |
| C  | 5.55858400  | 0.44238500  | -1.06015600 |
| C  | 6.06837500  | -0.61501700 | -1.82259900 |
| H  | 5.38740000  | -1.28033700 | -2.34538800 |
| C  | 7.44938000  | -0.79973200 | -1.88620200 |
| H  | 7.87081500  | -1.61240200 | -2.47032600 |
| C  | 8.27262400  | 0.08197700  | -1.18761200 |

|    |             |             |             |
|----|-------------|-------------|-------------|
| H  | 9.35321000  | -0.01646700 | -1.20677100 |
| C  | 7.67438500  | 1.11014500  | -0.45761900 |
| H  | 8.28921600  | 1.81853900  | 0.09310500  |
| C  | 0.59097700  | -2.68980600 | 1.35418700  |
| H  | 1.07857400  | -3.11108700 | 0.48493100  |
| C  | -0.14240700 | -3.49987900 | 2.21326700  |
| H  | -0.22328100 | -4.56135400 | 2.00807500  |
| C  | -0.76039700 | -2.91809200 | 3.32102900  |
| H  | -1.33990300 | -3.52184400 | 4.01211900  |
| C  | -0.61822100 | -1.54756700 | 3.53158800  |
| H  | -1.07638500 | -1.05207600 | 4.38066700  |
| C  | 0.12183700  | -0.80267800 | 2.61840800  |
| C  | 0.25419400  | 0.68867700  | 2.72204400  |
| H  | -0.65692100 | 1.15956100  | 2.34585600  |
| H  | 0.41017700  | 1.00860100  | 3.75853500  |
| C  | 1.34078000  | 2.64606000  | 1.77490000  |
| H  | 0.42846900  | 2.92532900  | 1.25021200  |
| H  | 2.20779300  | 2.99988100  | 1.21738700  |
| H  | 1.34248600  | 3.08209000  | 2.77954600  |
| C  | 2.67811800  | -1.94530000 | -0.93336400 |
| O  | 2.92109600  | -2.97568800 | -1.54704400 |
| O  | 1.59570200  | -1.21645000 | -1.17137300 |
| Mn | -2.26273400 | 0.14910200  | -0.18019800 |
| N  | -2.35412700 | 0.94942900  | -2.21874900 |
| N  | -4.30672500 | -0.10186100 | -0.44500100 |
| N  | -2.38489800 | -1.96590200 | -0.76708300 |
| N  | -2.20714900 | 2.53490500  | -0.00895400 |
| C  | -3.79040800 | 1.31185500  | -2.42137200 |
| H  | -3.97856500 | 2.25595600  | -1.90795400 |
| H  | -3.99664000 | 1.46084200  | -3.48817800 |
| C  | -4.68635400 | 0.22110900  | -1.86253100 |
| H  | -4.58020100 | -0.69700300 | -2.44259300 |
| H  | -5.73854000 | 0.52040000  | -1.89642500 |
| C  | -4.93587100 | 0.79615600  | 0.55940000  |
| H  | -4.87834300 | 1.82760100  | 0.20364600  |
| H  | -5.98879000 | 0.53570800  | 0.70299400  |
| C  | -4.65869700 | -1.52334600 | -0.12615500 |
| H  | -4.66807400 | -1.63505600 | 0.96193700  |
| H  | -5.66679100 | -1.73922100 | -0.49383700 |
| C  | -3.63365200 | -2.46527600 | -0.69438300 |
| C  | -3.92142400 | -3.77302600 | -1.07430800 |
| H  | -4.93947000 | -4.14239700 | -1.01370800 |
| C  | -2.87834500 | -4.58046300 | -1.52940800 |



|   |             |             |             |
|---|-------------|-------------|-------------|
| H | -3.07378600 | -5.60524800 | -1.82947400 |
| C | -1.58687100 | -4.05457500 | -1.60565700 |
| H | -0.75250200 | -4.64899300 | -1.96129700 |
| C | -1.38096000 | -2.73478900 | -1.22155800 |
| H | -0.40811100 | -2.26249900 | -1.27737700 |
| C | -2.31794300 | 3.29898400  | 1.09234700  |
| H | -2.77191300 | 2.83389200  | 1.95966700  |
| C | -1.87795800 | 4.61733700  | 1.13785900  |
| H | -1.98954600 | 5.19477300  | 2.04906300  |
| C | -1.29277200 | 5.16408800  | -0.00696700 |
| H | -0.93542800 | 6.18916700  | -0.00984800 |
| C | -1.17896100 | 4.37566000  | -1.14954300 |
| H | -0.73659600 | 4.76248400  | -2.06206600 |
| C | -1.64540200 | 3.06021500  | -1.10921400 |
| C | -1.48499800 | 2.14477500  | -2.29772400 |
| H | -0.44874400 | 1.79461000  | -2.32257000 |
| H | -1.67922900 | 2.68980200  | -3.23060100 |
| C | -1.89362100 | -0.04381000 | -3.21903100 |
| H | -0.88849100 | -0.37433300 | -2.95052200 |
| H | -2.55793900 | -0.90682600 | -3.22408100 |
| H | -1.88001700 | 0.40647600  | -4.21961900 |
| C | -4.15528500 | 0.70326100  | 1.87478400  |
| O | -4.67395100 | 1.06643200  | 2.93350100  |
| O | -2.93282200 | 0.26787600  | 1.76086600  |
| O | 1.51138700  | 1.66630000  | -0.79249300 |

<sup>1</sup>TS<sub>5</sub>

|    |             |             |             |
|----|-------------|-------------|-------------|
| Mn | 1.17570600  | -0.16846700 | -0.11680200 |
| O  | -0.44772600 | 0.68196100  | -0.30160200 |
| N  | 1.24668700  | -0.33013400 | -2.27477000 |
| N  | 3.40004500  | -0.10034600 | -0.44184800 |
| N  | 6.20093900  | 0.77460800  | 1.02273900  |
| N  | 0.75022300  | -2.45011300 | -0.62429100 |
| C  | 2.61906200  | -0.75896400 | -2.67611700 |
| H  | 2.71726200  | -1.82442800 | -2.46147300 |
| H  | 2.74778700  | -0.62139200 | -3.75621600 |
| C  | 3.65138600  | 0.03855400  | -1.90596900 |
| H  | 3.58244600  | 1.09625500  | -2.16202200 |
| H  | 4.66280300  | -0.29711800 | -2.15947100 |
| C  | 3.96829100  | -1.36428200 | 0.08227500  |
| H  | 3.68995400  | -2.17660800 | -0.59583100 |
| H  | 5.05882700  | -1.32060600 | 0.12929900  |
| C  | 3.89439000  | 1.09700400  | 0.31490000  |

|    |             |             |             |
|----|-------------|-------------|-------------|
| H  | 3.29261400  | 1.94627500  | -0.01854000 |
| H  | 3.68961000  | 0.91620500  | 1.36830200  |
| C  | 5.37102000  | 1.39442100  | 0.15987000  |
| C  | 5.83180300  | 2.27793100  | -0.82213100 |
| H  | 5.12565900  | 2.77019900  | -1.48317000 |
| C  | 7.20137500  | 2.51853800  | -0.92958400 |
| H  | 7.58341000  | 3.20233400  | -1.68181700 |
| C  | 8.06543000  | 1.86931500  | -0.04882900 |
| H  | 9.13870000  | 2.02484700  | -0.08977700 |
| C  | 7.51566800  | 1.01266600  | 0.90521100  |
| H  | 8.15985000  | 0.49789400  | 1.61461200  |
| C  | 0.89791500  | -3.53706400 | 0.14919800  |
| H  | 1.17058700  | -3.35204800 | 1.18076700  |
| C  | 0.71745600  | -4.82964100 | -0.33672800 |
| H  | 0.84879800  | -5.67843000 | 0.32533000  |
| C  | 0.36641200  | -4.99737400 | -1.67623100 |
| H  | 0.22336400  | -5.99057100 | -2.09057900 |
| C  | 0.20443000  | -3.86885700 | -2.48020300 |
| H  | -0.06119100 | -3.95409500 | -3.52865600 |
| C  | 0.40280000  | -2.61123600 | -1.91541300 |
| C  | 0.23775300  | -1.33533900 | -2.69935000 |
| H  | -0.75094900 | -0.91201400 | -2.49964400 |
| H  | 0.32412900  | -1.51938800 | -3.77659300 |
| C  | 0.91157500  | 0.99560300  | -2.85759100 |
| H  | 1.56684300  | 1.76085600  | -2.43899500 |
| H  | 1.03357200  | 0.96312900  | -3.94706400 |
| H  | -0.11781400 | 1.24382000  | -2.60465500 |
| C  | 3.39119900  | -1.71037800 | 1.45236800  |
| O  | 4.04324600  | -2.41385400 | 2.23386200  |
| O  | 2.19495100  | -1.26051300 | 1.66608200  |
| Mn | -2.24244100 | 0.72228600  | -0.04203900 |
| N  | -2.66818200 | 0.59159200  | 2.27820300  |
| N  | -4.32774200 | 1.19679900  | 0.02313700  |
| N  | -2.19222000 | 2.82782600  | 0.00977500  |
| N  | -2.32512100 | -1.41195400 | 0.46598900  |
| C  | -4.13461900 | 0.37875800  | 2.36379600  |
| H  | -4.35350300 | -0.65508800 | 2.08761400  |
| H  | -4.49344900 | 0.52976700  | 3.39072600  |
| C  | -4.85442400 | 1.32461400  | 1.42168100  |
| H  | -4.70081700 | 2.35849100  | 1.73561300  |
| H  | -5.93244300 | 1.13367000  | 1.42138600  |
| C  | -5.01300100 | 0.13869100  | -0.75918800 |
| H  | -5.06705200 | -0.76918300 | -0.15206300 |

|   |             |             |             |
|---|-------------|-------------|-------------|
| H | -6.03263600 | 0.44605000  | -1.01361100 |
| C | -4.46846500 | 2.51116500  | -0.68064100 |
| H | -4.37006400 | 2.34055900  | -1.75619400 |
| H | -5.46231600 | 2.93046100  | -0.49468600 |
| C | -3.37160500 | 3.43619200  | -0.24226000 |
| C | -3.51474300 | 4.81474500  | -0.12992800 |
| H | -4.47732200 | 5.27329800  | -0.32810300 |
| C | -2.40706200 | 5.57603500  | 0.24430600  |
| H | -2.49466200 | 6.65340600  | 0.34323800  |
| C | -1.19163600 | 4.93816000  | 0.49871700  |
| H | -0.31091200 | 5.49584700  | 0.79695700  |
| C | -1.12198800 | 3.55628200  | 0.37451000  |
| H | -0.21759600 | 2.99585200  | 0.57303700  |
| C | -2.48598000 | -2.39206500 | -0.44479400 |
| H | -2.59558700 | -2.07746800 | -1.47310000 |
| C | -2.50724900 | -3.73586900 | -0.09811900 |
| H | -2.64366500 | -4.48606500 | -0.86785600 |
| C | -2.32398600 | -4.08361000 | 1.24046400  |
| H | -2.32742900 | -5.12463300 | 1.54729300  |
| C | -2.13479400 | -3.07262700 | 2.17952500  |
| H | -1.99464000 | -3.29811700 | 3.23137000  |
| C | -2.14114700 | -1.74291700 | 1.76120300  |
| C | -1.93970700 | -0.60637700 | 2.72972300  |
| H | -0.87580400 | -0.35564600 | 2.76071100  |
| H | -2.25141800 | -0.90871900 | 3.73892900  |
| C | -2.24108500 | 1.77182600  | 3.05355100  |
| H | -1.17636400 | 1.93918300  | 2.88792100  |
| H | -2.78757400 | 2.65544600  | 2.72099200  |
| H | -2.42598400 | 1.62224600  | 4.12708100  |
| C | -4.20718100 | -0.18015300 | -2.02396000 |
| O | -4.75466400 | -0.77450900 | -2.96084600 |
| O | -2.96216200 | 0.17671400  | -1.98671300 |
| O | 0.52700000  | 0.91799100  | 1.37991300  |
| O | 1.49139700  | 0.86532600  | 2.87402800  |
| H | 2.15182500  | 1.55943100  | 2.68402900  |
| H | 1.92502700  | -0.01254300 | 2.60919300  |

<sup>36</sup>

|    |             |             |             |
|----|-------------|-------------|-------------|
| Mn | -1.23025600 | -0.10516200 | -0.17463100 |
| O  | 0.53972400  | -0.29005500 | -0.02855600 |
| N  | -1.39560000 | -0.63510400 | -2.15738800 |
| N  | -3.40522900 | 0.01882500  | -0.28336600 |
| N  | -6.30465700 | 0.14754300  | 1.06412800  |

|    |             |             |             |
|----|-------------|-------------|-------------|
| N  | -0.73457500 | 1.70105300  | -1.14203300 |
| C  | -2.67816500 | -0.02287300 | -2.65623100 |
| H  | -2.51658100 | 1.04752600  | -2.78019600 |
| H  | -2.91695300 | -0.44010600 | -3.64102500 |
| C  | -3.81974600 | -0.26279100 | -1.69129900 |
| H  | -4.11844000 | -1.31086300 | -1.73312500 |
| H  | -4.68767500 | 0.34146000  | -1.97416700 |
| C  | -3.59118300 | 1.41208300  | 0.19112700  |
| H  | -3.24615200 | 2.10814900  | -0.57762600 |
| H  | -4.63722500 | 1.63162200  | 0.40958800  |
| C  | -4.14283900 | -0.92702900 | 0.63065600  |
| H  | -3.77707200 | -1.92510500 | 0.40066500  |
| H  | -3.85738400 | -0.69324100 | 1.65753900  |
| C  | -5.65335000 | -0.89561900 | 0.51184500  |
| C  | -6.32716900 | -1.94888300 | -0.11653300 |
| H  | -5.76493100 | -2.77444700 | -0.54151900 |
| C  | -7.71993800 | -1.92014200 | -0.18824700 |
| H  | -8.26348700 | -2.72823400 | -0.66874500 |
| C  | -8.39545600 | -0.83606400 | 0.36934900  |
| H  | -9.47805600 | -0.76599100 | 0.34102000  |
| C  | -7.64246700 | 0.16776900  | 0.97938400  |
| H  | -8.13684700 | 1.02529500  | 1.43043100  |
| C  | -0.69615200 | 2.94500500  | -0.63377500 |
| H  | -1.09963800 | 3.08242800  | 0.36142300  |
| C  | -0.16385000 | 4.01780200  | -1.33893000 |
| H  | -0.16415400 | 5.00439800  | -0.89123600 |
| C  | 0.38449800  | 3.78738700  | -2.60045000 |
| H  | 0.81630500  | 4.60206400  | -3.17296200 |
| C  | 0.37318900  | 2.49218900  | -3.11544000 |
| H  | 0.78668300  | 2.26712900  | -4.09260200 |
| C  | -0.19808400 | 1.47228800  | -2.36162900 |
| C  | -0.26250200 | 0.04612700  | -2.83936000 |
| H  | 0.66020900  | -0.47142100 | -2.56812500 |
| H  | -0.38597600 | -0.00134500 | -3.92769300 |
| C  | -1.35305900 | -2.09507000 | -2.39813700 |
| H  | -0.39733100 | -2.48233000 | -2.04084100 |
| H  | -2.16031500 | -2.57626400 | -1.84361100 |
| H  | -1.46298400 | -2.31093600 | -3.46807000 |
| C  | -2.74957800 | 1.59845300  | 1.46302400  |
| O  | -3.04158700 | 2.44842100  | 2.29996800  |
| O  | -1.69538000 | 0.81188100  | 1.56047800  |
| Mn | 2.29343800  | -0.36852600 | 0.01898100  |
| N  | 2.49064600  | -0.36192400 | 2.21624300  |

|   |            |             |             |
|---|------------|-------------|-------------|
| N | 4.36366800 | -0.72039300 | 0.11165000  |
| N | 2.41609200 | -2.58718000 | -0.18267800 |
| N | 2.37515000 | 1.94714900  | 0.77796200  |
| C | 3.93744500 | -0.09367900 | 2.47877800  |
| H | 4.12341100 | 0.96997400  | 2.32843700  |
| H | 4.18503000 | -0.33389300 | 3.52010000  |
| C | 4.80154600 | -0.91088700 | 1.53440400  |
| H | 4.71057200 | -1.97469300 | 1.76081200  |
| H | 5.85691400 | -0.63691500 | 1.63411600  |
| C | 4.97462700 | 0.46138700  | -0.54767100 |
| H | 4.98311600 | 1.29878200  | 0.15464700  |
| H | 6.00684500 | 0.25013500  | -0.84458700 |
| C | 4.67508500 | -1.94731900 | -0.68738000 |
| H | 4.61919800 | -1.68296600 | -1.74767100 |
| H | 5.69845800 | -2.27448300 | -0.47676800 |
| C | 3.66731200 | -3.02950400 | -0.41087400 |
| C | 3.97219000 | -4.38784300 | -0.42864700 |
| H | 4.99269700 | -4.71196900 | -0.60257700 |
| C | 2.94283900 | -5.30550000 | -0.21389500 |
| H | 3.15256900 | -6.37063500 | -0.22040900 |
| C | 1.64682800 | -4.83990900 | 0.01748200  |
| H | 0.82342800 | -5.52356800 | 0.19325500  |
| C | 1.42380300 | -3.46702700 | 0.03189200  |
| H | 0.44516200 | -3.04010600 | 0.22186100  |
| C | 2.62669700 | 3.08033900  | 0.10377900  |
| H | 3.02641900 | 2.97079300  | -0.89785700 |
| C | 2.39512600 | 4.34297200  | 0.64148500  |
| H | 2.62239100 | 5.22893500  | 0.05892400  |
| C | 1.85016200 | 4.43090700  | 1.92279100  |
| H | 1.64448000 | 5.39759200  | 2.37218600  |
| C | 1.58472800 | 3.25639000  | 2.62528400  |
| H | 1.17982500 | 3.27967200  | 3.63198000  |
| C | 1.87140100 | 2.03148100  | 2.02171900  |
| C | 1.63507600 | 0.72705500  | 2.74344200  |
| H | 0.59422500 | 0.42139300  | 2.60279600  |
| H | 1.80864100 | 0.85567700  | 3.81996600  |
| C | 2.06223600 | -1.64312200 | 2.82529200  |
| H | 1.03555300 | -1.85176600 | 2.52452800  |
| H | 2.70051900 | -2.45623000 | 2.48129200  |
| H | 2.11946300 | -1.58005600 | 3.91992000  |
| C | 4.13125100 | 0.86824200  | -1.76274300 |
| O | 4.61444100 | 1.60595400  | -2.62739500 |
| O | 2.90811200 | 0.42260300  | -1.77130800 |

|   |             |             |            |
|---|-------------|-------------|------------|
| O | -1.48819100 | -1.82355800 | 0.55898100 |
| O | -1.38380000 | -1.71320400 | 2.09425800 |
| H | -2.18098600 | -2.19565100 | 2.41152600 |
| H | -1.55951500 | -0.72141900 | 2.23967500 |

### 3

|    |             |             |             |
|----|-------------|-------------|-------------|
| Mn | -0.00374000 | -0.03937500 | -0.55597500 |
| O  | 0.15924700  | -0.88072600 | -1.98608600 |
| N  | 0.25880500  | -1.63333500 | 0.78055100  |
| N  | -0.59538200 | 1.01822700  | 1.25825000  |
| N  | -2.04650700 | -0.18512700 | -0.63061400 |
| N  | 2.07555000  | -0.09478100 | -0.36090400 |
| C  | 0.50744100  | -1.00575500 | 2.13035300  |
| H  | 1.51579500  | -0.58952800 | 2.12576700  |
| H  | 0.46677700  | -1.78501900 | 2.89910600  |
| C  | -0.49893400 | 0.09017700  | 2.42095800  |
| H  | -1.48967000 | -0.33926200 | 2.58051200  |
| H  | -0.22000000 | 0.63332000  | 3.32998400  |
| C  | 0.33554600  | 2.16143800  | 1.24880000  |
| H  | 1.33350100  | 1.82072000  | 1.54214800  |
| H  | 0.02553200  | 2.95937000  | 1.93144700  |
| C  | -1.99070500 | 1.50169200  | 1.08773000  |
| H  | -1.97767100 | 2.45416100  | 0.54836400  |
| H  | -2.46200000 | 1.68885000  | 2.05752900  |
| C  | -2.76979700 | 0.51993300  | 0.26705600  |
| C  | -4.14984400 | 0.37301100  | 0.36193600  |
| H  | -4.69612600 | 0.94701600  | 1.10234800  |
| C  | -4.79649200 | -0.51166100 | -0.49883500 |
| H  | -5.87188200 | -0.64554700 | -0.43882700 |
| C  | -4.04349200 | -1.22476500 | -1.43360500 |
| H  | -4.50600900 | -1.92310200 | -2.12178300 |
| C  | -2.66915000 | -1.03915900 | -1.46780900 |
| H  | -2.02594700 | -1.57006500 | -2.15756800 |
| C  | 2.94522400  | 0.86598000  | -0.72628200 |
| H  | 2.52991200  | 1.81129700  | -1.04652900 |
| C  | 4.31871700  | 0.65951500  | -0.70895300 |
| H  | 4.98080900  | 1.46398300  | -1.00816100 |
| C  | 4.81018700  | -0.58150300 | -0.30457400 |
| H  | 5.87831300  | -0.77106400 | -0.27470700 |
| C  | 3.90791600  | -1.57763300 | 0.06347700  |
| H  | 4.24351000  | -2.55677600 | 0.38726900  |
| C  | 2.54547900  | -1.30596600 | 0.01320600  |
| C  | 1.49691100  | -2.32763000 | 0.33451900  |

|   |             |             |             |
|---|-------------|-------------|-------------|
| H | 1.25502100  | -2.89735300 | -0.56710400 |
| H | 1.83820100  | -3.02572100 | 1.10671000  |
| C | -0.86017000 | -2.60946200 | 0.82883900  |
| H | -1.04089000 | -2.98594300 | -0.17860300 |
| H | -1.76366300 | -2.12743200 | 1.19999900  |
| H | -0.59101000 | -3.43963400 | 1.49155100  |
| O | 0.11102800  | 1.79800400  | -1.13167100 |
| C | 0.39811900  | 2.68740400  | -0.18939100 |
| O | 0.71747400  | 3.84191000  | -0.44544500 |

## 8

|    |             |             |             |
|----|-------------|-------------|-------------|
| Mn | -0.68217900 | 0.01643500  | 0.01984900  |
| O  | 0.36467100  | 1.22140800  | -0.49509800 |
| N  | -1.06031000 | -0.84353600 | -1.84736400 |
| N  | -2.30254700 | -1.28705200 | 0.64718300  |
| N  | -2.28276800 | 1.29551100  | -0.02692800 |
| N  | 0.90071800  | -1.33974400 | -0.16088500 |
| C  | -1.68788600 | -2.18701700 | -1.56657100 |
| H  | -0.90395900 | -2.85472200 | -1.20796100 |
| H  | -2.08127600 | -2.59767900 | -2.50241800 |
| C  | -2.78432700 | -2.07531300 | -0.52543100 |
| H  | -3.64850400 | -1.55363600 | -0.93969600 |
| H  | -3.11432700 | -3.07116600 | -0.21253300 |
| C  | -1.65861400 | -2.05171500 | 1.73296700  |
| H  | -0.97892700 | -2.79392100 | 1.30243400  |
| H  | -2.38623600 | -2.57230600 | 2.36365200  |
| C  | -3.39829000 | -0.44847200 | 1.20392400  |
| H  | -3.18764300 | -0.23834200 | 2.25751300  |
| H  | -4.35367800 | -0.98047000 | 1.16744600  |
| C  | -3.45778900 | 0.86098000  | 0.47826600  |
| C  | -4.61488400 | 1.62650100  | 0.38008500  |
| H  | -5.54341100 | 1.24182800  | 0.78730900  |
| C  | -4.54992300 | 2.87310700  | -0.23912500 |
| H  | -5.44095000 | 3.48637500  | -0.32803700 |
| C  | -3.32735500 | 3.32039700  | -0.74414400 |
| H  | -3.23280800 | 4.28407300  | -1.23157700 |
| C  | -2.21386700 | 2.50191200  | -0.62490800 |
| H  | -1.23998000 | 2.78125300  | -1.00548100 |
| C  | 1.72442400  | -1.74659900 | 0.82266900  |
| H  | 1.46740800  | -1.46124700 | 1.83261900  |
| C  | 2.86447400  | -2.49686600 | 0.56135800  |
| H  | 3.49678300  | -2.80594800 | 1.38564200  |
| C  | 3.16635300  | -2.82983200 | -0.75876200 |

|   |             |             |             |
|---|-------------|-------------|-------------|
| H | 4.04792800  | -3.41753500 | -0.99303700 |
| C | 2.32062300  | -2.39245400 | -1.77652200 |
| H | 2.51780700  | -2.62124900 | -2.81800000 |
| C | 1.20372900  | -1.63455700 | -1.44514300 |
| C | 0.27621600  | -1.05327800 | -2.46772000 |
| H | 0.65568200  | -0.07783400 | -2.78487700 |
| H | 0.18669500  | -1.69906200 | -3.34797500 |
| C | -1.90296800 | -0.02658800 | -2.75782500 |
| H | -1.44357800 | 0.95534600  | -2.87557200 |
| H | -2.90190500 | 0.08936700  | -2.33984900 |
| H | -1.97043900 | -0.52276200 | -3.73237600 |
| O | -0.44859500 | 0.03452000  | 1.92741300  |
| C | -0.84229200 | -1.05976800 | 2.56924200  |
| O | -0.55142400 | -1.27921400 | 3.73769100  |
| O | 2.32315600  | 1.33377500  | 1.35917900  |
| H | 1.61469700  | 1.29730800  | 0.65505100  |
| O | 3.21334900  | 2.35982700  | 0.83557700  |
| C | 4.30714900  | 1.75181600  | 0.08797700  |
| C | 5.15500600  | 2.97468300  | -0.27177600 |
| H | 5.50832700  | 3.48219600  | 0.63220200  |
| H | 6.02544500  | 2.65745400  | -0.85477900 |
| H | 4.57708700  | 3.68595000  | -0.87178800 |
| C | 3.77144000  | 1.06019900  | -1.16631200 |
| H | 3.13345500  | 0.21580000  | -0.90097200 |
| H | 3.19148600  | 1.76178500  | -1.77576300 |
| H | 4.60186300  | 0.67855000  | -1.77011200 |
| C | 5.08425600  | 0.78064800  | 0.97793300  |
| H | 5.41195700  | 1.28121000  | 1.89573700  |
| H | 4.46829400  | -0.08197900 | 1.24732600  |
| H | 5.96943700  | 0.41500700  | 0.44641500  |

TBHP

|   |             |             |             |
|---|-------------|-------------|-------------|
| O | -1.98889500 | 0.12492000  | -0.17020900 |
| H | -2.23724600 | -0.81475900 | -0.07774100 |
| O | -0.73194600 | 0.01615200  | -0.89674400 |
| C | 0.38980200  | -0.00143700 | 0.03706800  |
| C | 1.58289300  | -0.09968800 | -0.91699300 |
| H | 1.61122800  | 0.76089100  | -1.59385000 |
| H | 2.51120100  | -0.11513600 | -0.33717200 |
| H | 1.53113100  | -1.01652300 | -1.51382300 |
| C | 0.29995300  | -1.23041300 | 0.94252400  |
| H | -0.57743500 | -1.17374800 | 1.59449600  |
| H | 0.23342700  | -2.14441800 | 0.34178100  |



|   |             |             |            |
|---|-------------|-------------|------------|
| H | 1.19028400  | -1.29564600 | 1.57659500 |
| C | 0.42545700  | 1.29857200  | 0.84046400 |
| H | 0.46272100  | 2.16271300  | 0.16810800 |
| H | -0.45991500 | 1.38728300  | 1.47661100 |
| H | 1.31270100  | 1.31855600  | 1.48224900 |

**TS<sub>8-9</sub>**

|    |             |             |             |
|----|-------------|-------------|-------------|
| Mn | -0.62866500 | -0.11628700 | -0.22313000 |
| O  | 0.30755100  | -1.49814600 | 0.18628800  |
| N  | -0.85803200 | 0.54575100  | 1.99662600  |
| N  | -2.17377500 | 1.41029500  | -0.37618900 |
| N  | -2.42945800 | -1.27432500 | -0.19499400 |
| N  | 1.15059100  | 1.17108100  | 0.24981200  |
| C  | -1.48362200 | 1.89203600  | 1.95635200  |
| H  | -0.72099800 | 2.61546400  | 1.66010500  |
| H  | -1.84699500 | 2.18248600  | 2.95108000  |
| C  | -2.62822800 | 1.90501900  | 0.96066900  |
| H  | -3.43013200 | 1.24706000  | 1.29989200  |
| H  | -3.04700600 | 2.91193700  | 0.85894200  |
| C  | -1.58054600 | 2.47576900  | -1.21597700 |
| H  | -0.88782900 | 3.06433500  | -0.60743600 |
| H  | -2.35011900 | 3.14645400  | -1.61189100 |
| C  | -3.31671600 | 0.77284200  | -1.09452600 |
| H  | -3.05941900 | 0.69229000  | -2.15467500 |
| H  | -4.21170900 | 1.39810000  | -1.01376400 |
| C  | -3.54841100 | -0.61042400 | -0.55575900 |
| C  | -4.80436500 | -1.20049700 | -0.45799300 |
| H  | -5.68588300 | -0.63752200 | -0.74444400 |
| C  | -4.89707900 | -2.50912700 | 0.01682700  |
| H  | -5.86631700 | -2.98942900 | 0.10623400  |
| C  | -3.73394400 | -3.18859200 | 0.38342100  |
| H  | -3.76587700 | -4.20431100 | 0.76121200  |
| C  | -2.51419000 | -2.53364400 | 0.26692200  |
| H  | -1.57500300 | -2.99775200 | 0.54285800  |
| C  | 1.98409800  | 1.70031400  | -0.66364700 |
| H  | 1.72283900  | 1.54016200  | -1.70132000 |
| C  | 3.12496200  | 2.41105600  | -0.30927000 |
| H  | 3.76370300  | 2.82310700  | -1.08251900 |
| C  | 3.41816300  | 2.57118600  | 1.04536300  |
| H  | 4.29808800  | 3.12330700  | 1.36028000  |
| C  | 2.56238000  | 2.01030600  | 1.99132600  |
| H  | 2.75288000  | 2.11028900  | 3.05471700  |
| C  | 1.43899900  | 1.30751700  | 1.55826900  |

|   |             |             |             |
|---|-------------|-------------|-------------|
| C | 0.51373300  | 0.61772700  | 2.52814400  |
| H | 0.86960000  | -0.40859500 | 2.67118000  |
| H | 0.53646000  | 1.12082500  | 3.50391200  |
| C | -1.65456800 | -0.41226000 | 2.78884700  |
| H | -1.21630400 | -1.40745700 | 2.68676300  |
| H | -2.67943800 | -0.44637600 | 2.41801300  |
| H | -1.66748400 | -0.12554000 | 3.84953000  |
| O | -0.41364700 | 0.60226500  | -2.12915900 |
| C | -0.77976600 | 1.83624100  | -2.34943000 |
| O | -0.48914500 | 2.47805900  | -3.36022100 |
| O | 1.99582200  | -2.07238700 | -1.42686900 |
| O | 3.10585400  | -1.24382300 | -1.25521200 |
| C | 4.08038900  | -1.80169200 | -0.29548900 |
| C | 5.22263000  | -0.79157500 | -0.38857200 |
| H | 6.02943100  | -1.10085300 | 0.28319600  |
| H | 5.61873300  | -0.74453500 | -1.40823000 |
| H | 4.88593000  | 0.20614900  | -0.09119500 |
| C | 4.50806300  | -3.19094500 | -0.76293200 |
| H | 5.29861200  | -3.56639400 | -0.10530200 |
| H | 3.66914700  | -3.89114600 | -0.72887200 |
| H | 4.89574600  | -3.14948600 | -1.78620100 |
| C | 3.46574100  | -1.82798600 | 1.10370100  |
| H | 3.14514100  | -0.82630200 | 1.40402800  |
| H | 2.60882400  | -2.50538700 | 1.14630300  |
| H | 4.21737300  | -2.18065000 | 1.81755700  |
| H | 1.27152700  | -1.79003800 | -0.64459400 |

tBuOO•

|   |             |             |             |
|---|-------------|-------------|-------------|
| O | 1.98141500  | -0.00006200 | -0.18724100 |
| O | 0.84135100  | -0.00166900 | -0.84859100 |
| C | -0.37127100 | 0.00009800  | 0.04934300  |
| C | -1.51787900 | -0.00163800 | -0.95263000 |
| H | -1.48163100 | -0.89372600 | -1.58648500 |
| H | -2.46827300 | -0.00123200 | -0.40992900 |
| H | -1.48217900 | 0.88879900  | -1.58880700 |
| C | -0.32444700 | 1.27108500  | 0.88781800  |
| H | 0.56243100  | 1.27902900  | 1.52752300  |
| H | -0.31058700 | 2.15831900  | 0.24637900  |
| H | -1.21386000 | 1.31472800  | 1.52430400  |
| C | -0.32424700 | -1.26807300 | 0.89208100  |
| H | -0.30574500 | -2.15726500 | 0.25346100  |
| H | 0.56047400  | -1.27158900 | 1.53484900  |
| H | -1.21569200 | -1.31204500 | 1.52568200  |

9

|    |             |             |             |
|----|-------------|-------------|-------------|
| Mn | -0.08705500 | -0.05311100 | 0.66817900  |
| O  | 0.06606900  | 0.90196800  | 2.21854300  |
| N  | 0.24019700  | 1.64675000  | -0.82357700 |
| N  | -0.62494500 | -1.05581900 | -1.11033700 |
| N  | -2.23654100 | 0.19481400  | 0.66910300  |
| N  | 2.20525100  | 0.18338000  | 0.38760800  |
| C  | 0.40472100  | 0.96076700  | -2.13517000 |
| H  | 1.40619600  | 0.52706000  | -2.17005100 |
| H  | 0.32363400  | 1.68000700  | -2.96040800 |
| C  | -0.63688000 | -0.13156400 | -2.29245300 |
| H  | -1.63667500 | 0.30052400  | -2.35757400 |
| H  | -0.46400000 | -0.70865900 | -3.20643400 |
| C  | 0.36305600  | -2.15720000 | -1.23989100 |
| H  | 1.30136500  | -1.74391300 | -1.62068400 |
| H  | 0.00883000  | -2.91783800 | -1.94250100 |
| C  | -1.99459200 | -1.61810200 | -0.89306700 |
| H  | -1.90694300 | -2.48763000 | -0.23509300 |
| H  | -2.41299000 | -1.95711800 | -1.84582500 |
| C  | -2.87078300 | -0.59624900 | -0.22185200 |
| C  | -4.23850900 | -0.48395000 | -0.44921700 |
| H  | -4.71806200 | -1.12421900 | -1.18150300 |
| C  | -4.96241400 | 0.46190500  | 0.27803800  |
| H  | -6.03061600 | 0.57042100  | 0.11861300  |
| C  | -4.30019100 | 1.26928600  | 1.20488000  |
| H  | -4.82980300 | 2.01558100  | 1.78625000  |
| C  | -2.92905700 | 1.10906300  | 1.36752200  |
| H  | -2.35289800 | 1.71281600  | 2.05931100  |
| C  | 3.14686000  | -0.70482500 | 0.75507300  |
| H  | 2.78771400  | -1.64482300 | 1.15595800  |
| C  | 4.50708300  | -0.44286200 | 0.63569900  |
| H  | 5.23030700  | -1.19073600 | 0.94170900  |
| C  | 4.90594400  | 0.78872400  | 0.11328900  |
| H  | 5.95917300  | 1.02584900  | -0.00141500 |
| C  | 3.93175100  | 1.71029300  | -0.26525300 |
| H  | 4.19859300  | 2.67664700  | -0.68054000 |
| C  | 2.58761800  | 1.37575100  | -0.10558300 |
| C  | 1.48327500  | 2.34688800  | -0.44046200 |
| H  | 1.26209100  | 2.94768500  | 0.44841600  |
| H  | 1.80467200  | 3.03276500  | -1.23524200 |
| C  | -0.87795200 | 2.61551100  | -0.84235200 |
| H  | -1.02845500 | 3.00053300  | 0.16833700  |

|                          |             |             |             |
|--------------------------|-------------|-------------|-------------|
| H                        | -1.79660700 | 2.12836900  | -1.16808900 |
| H                        | -0.65510700 | 3.44879500  | -1.52221000 |
| O                        | 0.37228800  | -2.00202200 | 1.15286300  |
| C                        | 0.64704900  | -2.77014700 | 0.13613700  |
| O                        | 1.14337700  | -3.89672500 | 0.21751400  |
| H                        | 0.98247900  | 0.82627900  | 2.54152700  |
| <b>TS<sub>9-10</sub></b> |             |             |             |
| Mn                       | -0.53664200 | 0.12480200  | -0.46840400 |
| O                        | 1.21973700  | -0.13227400 | -1.53895800 |
| N                        | -0.49306300 | 0.32390600  | 1.94667800  |
| N                        | -2.75638600 | -0.21324700 | 0.14135200  |
| N                        | -0.78921800 | -2.11402400 | -0.30145200 |
| N                        | 0.09891400  | 2.24776900  | 0.04293200  |
| C                        | -1.88345100 | 0.73914200  | 2.26123400  |
| H                        | -2.01522600 | 1.75989500  | 1.89054700  |
| H                        | -2.04180200 | 0.76075400  | 3.35007700  |
| C                        | -2.91952000 | -0.17393600 | 1.61575600  |
| H                        | -2.81569400 | -1.19194300 | 1.99651300  |
| H                        | -3.92831000 | 0.16544700  | 1.88451900  |
| C                        | -3.47346300 | 0.88000200  | -0.53763000 |
| H                        | -3.37319700 | 1.78857200  | 0.06511800  |
| H                        | -4.54520300 | 0.66475200  | -0.63615800 |
| C                        | -3.13157600 | -1.53062000 | -0.41392000 |
| H                        | -3.22199900 | -1.42402100 | -1.50048400 |
| H                        | -4.10393300 | -1.86513000 | -0.03016000 |
| C                        | -2.05408100 | -2.54791700 | -0.12510000 |
| C                        | -2.32688600 | -3.85235000 | 0.27995700  |
| H                        | -3.35491900 | -4.16755300 | 0.42447500  |
| C                        | -1.26246100 | -4.72800700 | 0.50203600  |
| H                        | -1.45186000 | -5.74708200 | 0.82522800  |
| C                        | 0.04336100  | -4.27566000 | 0.30993300  |
| H                        | 0.89862900  | -4.92228100 | 0.47350700  |
| C                        | 0.23430500  | -2.95684300 | -0.09091200 |
| H                        | 1.22492100  | -2.54799300 | -0.25424500 |
| C                        | 0.12224600  | 3.21397000  | -0.89345500 |
| H                        | -0.17968000 | 2.90961100  | -1.88989200 |
| C                        | 0.49915100  | 4.52018800  | -0.60643900 |
| H                        | 0.50735600  | 5.26902600  | -1.39096000 |
| C                        | 0.85317900  | 4.83385600  | 0.70825700  |
| H                        | 1.14655600  | 5.84487500  | 0.97401800  |
| C                        | 0.81525100  | 3.83529300  | 1.67894900  |
| H                        | 1.07225700  | 4.04506600  | 2.71227600  |
| C                        | 0.43774400  | 2.54233700  | 1.31013900  |

|   |             |             |             |
|---|-------------|-------------|-------------|
| C | 0.44367500  | 1.40577000  | 2.30608000  |
| H | 1.45253100  | 0.98345100  | 2.33169400  |
| H | 0.23547400  | 1.79305900  | 3.31412900  |
| C | -0.12036500 | -0.90661900 | 2.67185300  |
| H | 0.88878900  | -1.20554200 | 2.38065300  |
| H | -0.79997900 | -1.71951400 | 2.41534200  |
| H | -0.14864800 | -0.75129300 | 3.76118100  |
| O | -1.66271800 | 0.83296100  | -2.13094000 |
| C | -2.88231000 | 1.20482000  | -1.91719400 |
| O | -3.58390700 | 1.83366500  | -2.72638000 |
| O | 2.63222300  | -1.14822400 | -1.92443200 |
| H | 1.09889500  | 0.23042600  | -2.44011200 |
| O | 3.74944800  | -0.47881400 | -1.63214800 |
| C | 4.24759200  | -0.74029300 | -0.24139900 |
| C | 5.56666200  | 0.02431100  | -0.23856000 |
| H | 5.40060300  | 1.08893500  | -0.43281100 |
| H | 6.03543300  | -0.07966800 | 0.74482600  |
| H | 6.25208500  | -0.37389400 | -0.99370100 |
| C | 4.44746000  | -2.24087300 | -0.06654400 |
| H | 3.49529800  | -2.77595600 | -0.11412600 |
| H | 5.11735300  | -2.63381300 | -0.83816100 |
| H | 4.89704600  | -2.42831000 | 0.91376500  |
| C | 3.24480500  | -0.16249900 | 0.74981500  |
| H | 3.10040000  | 0.90871700  | 0.58003600  |
| H | 2.27927700  | -0.66473300 | 0.66609000  |
| H | 3.62570000  | -0.30768300 | 1.76605400  |

## 10

|    |             |             |             |
|----|-------------|-------------|-------------|
| Mn | -0.47332400 | 0.18583900  | -0.46602400 |
| O  | 1.55720900  | -0.06429700 | -1.75834400 |
| N  | -0.55134500 | 0.37683400  | 1.97694900  |
| N  | -2.78679900 | 0.14073200  | 0.05368300  |
| N  | -1.03851900 | -2.02234800 | -0.32402700 |
| N  | 0.49044900  | 2.17007300  | 0.10666500  |
| C  | -1.88288500 | 0.98380900  | 2.21196500  |
| H  | -1.85006100 | 2.00869400  | 1.82958900  |
| H  | -2.09550000 | 1.04181200  | 3.29097100  |
| C  | -3.00602700 | 0.21783400  | 1.51701400  |
| H  | -3.06416100 | -0.80027800 | 1.90831200  |
| H  | -3.96760700 | 0.69814500  | 1.74373600  |
| C  | -3.31114100 | 1.31040500  | -0.66455100 |
| H  | -3.12074800 | 2.20202000  | -0.05732600 |
| H  | -4.39645400 | 1.24546200  | -0.82088400 |

|   |             |             |             |
|---|-------------|-------------|-------------|
| C | -3.28501800 | -1.12406500 | -0.51826400 |
| H | -3.30456500 | -1.01424300 | -1.60826500 |
| H | -4.30986700 | -1.34315700 | -0.18952300 |
| C | -2.35758100 | -2.26760000 | -0.17213800 |
| C | -2.82308800 | -3.50262900 | 0.27480800  |
| H | -3.88903800 | -3.66205200 | 0.39988100  |
| C | -1.90232900 | -4.51075200 | 0.56631000  |
| H | -2.24420600 | -5.47772500 | 0.92276200  |
| C | -0.54107200 | -4.25492200 | 0.40210200  |
| H | 0.20976200  | -5.00647400 | 0.62093400  |
| C | -0.15511700 | -2.99376400 | -0.04230100 |
| H | 0.88836600  | -2.73634400 | -0.17976900 |
| C | 0.73453400  | 3.11620400  | -0.81813900 |
| H | 0.49422000  | 2.84703600  | -1.84162700 |
| C | 1.25313100  | 4.36414600  | -0.49322200 |
| H | 1.43811300  | 5.09686400  | -1.27129900 |
| C | 1.51480800  | 4.64195900  | 0.85060200  |
| H | 1.91213300  | 5.60801400  | 1.14706000  |
| C | 1.25010900  | 3.66657000  | 1.80981500  |
| H | 1.43230500  | 3.85127000  | 2.86369900  |
| C | 0.74232200  | 2.43124300  | 1.40156000  |
| C | 0.51517100  | 1.30888600  | 2.38918700  |
| H | 1.44710600  | 0.73869100  | 2.46280100  |
| H | 0.31739800  | 1.72495200  | 3.38822300  |
| C | -0.39138900 | -0.89590600 | 2.70475500  |
| H | 0.57776800  | -1.33352900 | 2.45290600  |
| H | -1.16664100 | -1.60437700 | 2.41183900  |
| H | -0.44495000 | -0.74509900 | 3.79429100  |
| O | -1.43608100 | 1.04921700  | -2.16962600 |
| C | -2.61519300 | 1.55132100  | -2.01465300 |
| O | -3.20717800 | 2.24887800  | -2.85757000 |
| O | 2.26510900  | -1.32365500 | -1.84113800 |
| H | 1.43447900  | 0.16657300  | -2.70214300 |
| O | 3.64100700  | -1.02462400 | -1.64344300 |
| C | 4.02834900  | -1.27847800 | -0.24232100 |
| C | 5.45963700  | -0.74094200 | -0.22588800 |
| H | 5.47454800  | 0.33373600  | -0.43423900 |
| H | 5.89477800  | -0.91159600 | 0.76378800  |
| H | 6.07838900  | -1.25569400 | -0.96850300 |
| C | 3.99119100  | -2.78361400 | 0.01557300  |
| H | 2.97196100  | -3.17242800 | -0.06558500 |
| H | 4.62576900  | -3.31077400 | -0.70452900 |
| H | 4.35690500  | -2.99730900 | 1.02530000  |

|   |            |             |            |
|---|------------|-------------|------------|
| C | 3.12542800 | -0.50886800 | 0.71920600 |
| H | 3.14831000 | 0.56461700  | 0.51017800 |
| H | 2.09080100 | -0.85671400 | 0.65329000 |
| H | 3.47370000 | -0.67229400 | 1.74429500 |

**TS<sub>3-11</sub>**

|    |             |             |             |
|----|-------------|-------------|-------------|
| Mn | 0.60734500  | -0.08891900 | -0.40401000 |
| O  | -0.51378300 | 0.91713800  | -1.27113600 |
| N  | 0.40948700  | -0.02887600 | 1.94115800  |
| N  | 2.38413300  | -1.19386100 | 0.22817500  |
| N  | 2.08686100  | 1.39730200  | -0.43570800 |
| N  | -1.00417600 | -1.49701600 | 0.13766600  |
| C  | 1.25259300  | -1.14923100 | 2.42855300  |
| H  | 0.71745900  | -2.08245300 | 2.23746100  |
| H  | 1.40892600  | -1.07193300 | 3.51302700  |
| C  | 2.58663500  | -1.16188100 | 1.70918000  |
| H  | 3.15603100  | -0.26187300 | 1.94806800  |
| H  | 3.18822500  | -2.02326600 | 2.01892000  |
| C  | 2.22223600  | -2.57152000 | -0.29052300 |
| H  | 1.52885600  | -3.11373600 | 0.35871700  |
| H  | 3.17867000  | -3.10545700 | -0.29100900 |
| C  | 3.53220500  | -0.52181000 | -0.45006800 |
| H  | 3.52503800  | -0.80648800 | -1.50625300 |
| H  | 4.48088400  | -0.85560100 | -0.01705800 |
| C  | 3.36511100  | 0.96791700  | -0.35600000 |
| C  | 4.41972400  | 1.86515600  | -0.22713600 |
| H  | 5.43560300  | 1.49277400  | -0.15446800 |
| C  | 4.13936100  | 3.23148000  | -0.18575300 |
| H  | 4.94603700  | 3.94998800  | -0.08007400 |
| C  | 2.81455800  | 3.66384500  | -0.27185200 |
| H  | 2.55830900  | 4.71673900  | -0.23798000 |
| C  | 1.80987800  | 2.71258900  | -0.39393100 |
| H  | 0.76100200  | 2.97677400  | -0.45521600 |
| C  | -1.54535000 | -2.35998600 | -0.74586400 |
| H  | -1.03984500 | -2.44089500 | -1.69889700 |
| C  | -2.68975700 | -3.09382700 | -0.46443400 |
| H  | -3.08650100 | -3.77705500 | -1.20707700 |
| C  | -3.30417300 | -2.92483800 | 0.77784400  |
| H  | -4.20066700 | -3.48123900 | 1.03268400  |
| C  | -2.74845800 | -2.03032300 | 1.68806000  |
| H  | -3.19273800 | -1.86933900 | 2.66470000  |
| C  | -1.59846100 | -1.32359200 | 1.33399200  |
| C  | -1.00555400 | -0.28937300 | 2.25630600  |

|   |             |             |             |
|---|-------------|-------------|-------------|
| H | -1.56017400 | 0.64331500  | 2.12460000  |
| H | -1.12746800 | -0.59901500 | 3.30332800  |
| C | 0.81827700  | 1.26860800  | 2.51778800  |
| H | 0.23269400  | 2.06297500  | 2.05024200  |
| H | 1.87382800  | 1.45572400  | 2.31871600  |
| H | 0.65242800  | 1.28362300  | 3.60420600  |
| O | 1.00375000  | -1.45241600 | -2.02140500 |
| C | 1.61979800  | -2.54546800 | -1.69797600 |
| O | 1.71444800  | -3.54919500 | -2.41650100 |
| O | -1.71931000 | 1.89576600  | 0.10099700  |
| O | -2.67510400 | 2.53915800  | -0.52972000 |
| C | -3.97967600 | 1.77651200  | -0.61051000 |
| C | -4.88694600 | 2.79061000  | -1.29414600 |
| H | -5.88147900 | 2.35109500  | -1.41702000 |
| H | -4.98152200 | 3.70033800  | -0.69251000 |
| H | -4.50023200 | 3.05506600  | -2.28362000 |
| C | -4.42299500 | 1.45229500  | 0.80998100  |
| H | -5.41447400 | 0.98994400  | 0.77234900  |
| H | -3.73570200 | 0.74813500  | 1.28582400  |
| H | -4.48555300 | 2.36265500  | 1.41462300  |
| C | -3.75113000 | 0.52981700  | -1.45352400 |
| H | -3.36785800 | 0.79119900  | -2.44459800 |
| H | -3.04880100 | -0.14538400 | -0.96434700 |
| H | -4.70596400 | 0.00801400  | -1.57392700 |

## 11

|    |             |             |             |
|----|-------------|-------------|-------------|
| Mn | 0.53593200  | -0.06426300 | -0.34157700 |
| O  | -0.65897800 | 1.23428600  | -0.92346300 |
| N  | 0.55149200  | -0.21652200 | 2.01547000  |
| N  | 2.22777700  | -1.33867200 | -0.01545100 |
| N  | 2.11038800  | 1.32745700  | -0.32938000 |
| N  | -1.12008700 | -1.38859100 | 0.22285300  |
| C  | 1.31369300  | -1.45949400 | 2.29001800  |
| H  | 0.67372300  | -2.31326000 | 2.05529400  |
| H  | 1.58248400  | -1.52712200 | 3.35280800  |
| C  | 2.56476900  | -1.50537800 | 1.43582300  |
| H  | 3.24232400  | -0.69581200 | 1.71176200  |
| H  | 3.10071800  | -2.44960700 | 1.57617300  |
| C  | 1.90545500  | -2.62638400 | -0.67734100 |
| H  | 1.20596200  | -3.17923200 | -0.04361700 |
| H  | 2.80843500  | -3.23199600 | -0.80640800 |
| C  | 3.37389600  | -0.67556200 | -0.71458400 |
| H  | 3.25394400  | -0.82278800 | -1.79141600 |



|   |             |             |             |
|---|-------------|-------------|-------------|
| H | 4.31715700  | -1.14029100 | -0.41139400 |
| C | 3.34934500  | 0.79792400  | -0.42586900 |
| C | 4.48348500  | 1.59161700  | -0.29604000 |
| H | 5.46697800  | 1.14040800  | -0.36634300 |
| C | 4.32278800  | 2.95960300  | -0.07045600 |
| H | 5.19319300  | 3.59894200  | 0.03804600  |
| C | 3.03692200  | 3.49582000  | 0.02190600  |
| H | 2.87501600  | 4.55286600  | 0.19991600  |
| C | 1.94795000  | 2.64357800  | -0.11074600 |
| H | 0.92390200  | 2.98986600  | -0.04112300 |
| C | -1.77929100 | -2.15422600 | -0.66977100 |
| H | -1.37361500 | -2.17115200 | -1.67249500 |
| C | -2.91945300 | -2.87266200 | -0.33588400 |
| H | -3.41416200 | -3.47566200 | -1.08900700 |
| C | -3.40022500 | -2.79425000 | 0.97216700  |
| H | -4.28733600 | -3.34429900 | 1.27013600  |
| C | -2.72222100 | -1.99973900 | 1.89277700  |
| H | -3.05927100 | -1.91184700 | 2.92025800  |
| C | -1.58725400 | -1.29976500 | 1.48409100  |
| C | -0.85413400 | -0.37616000 | 2.42187800  |
| H | -1.33314500 | 0.60694000  | 2.38214400  |
| H | -0.93325000 | -0.74200100 | 3.45491900  |
| C | 1.13892700  | 0.95711400  | 2.69145400  |
| H | 0.59997800  | 1.85371600  | 2.37713800  |
| H | 2.18687100  | 1.06912000  | 2.41127300  |
| H | 1.07046400  | 0.85586700  | 3.78385500  |
| O | 0.68539600  | -1.19573300 | -2.15287600 |
| C | 1.22466000  | -2.36825800 | -2.02559800 |
| O | 1.19142400  | -3.26782000 | -2.87343800 |
| O | -1.47862700 | 1.73953400  | 0.17419300  |
| O | -2.41925400 | 2.62656700  | -0.41397900 |
| C | -3.71491400 | 1.96454700  | -0.64720900 |
| C | -4.56131500 | 3.14337400  | -1.13252000 |
| H | -5.57378900 | 2.78987800  | -1.35161500 |
| H | -4.62316500 | 3.92319400  | -0.36646900 |
| H | -4.14010800 | 3.57557200  | -2.04631800 |
| C | -4.24472200 | 1.39514200  | 0.66669300  |
| H | -5.26063700 | 1.01419800  | 0.51832000  |
| H | -3.62126000 | 0.56825600  | 1.01665800  |
| H | -4.27293800 | 2.17118200  | 1.43901700  |
| C | -3.58763800 | 0.89183400  | -1.72611500 |
| H | -3.16128300 | 1.31200600  | -2.64276300 |
| H | -2.95629300 | 0.06799200  | -1.38934500 |

|                        |             |             |             |
|------------------------|-------------|-------------|-------------|
| H                      | -4.58023000 | 0.48920600  | -1.95597100 |
| <b>TS<sub>11</sub></b> |             |             |             |
| Mn                     | 0.45257800  | 0.03667200  | -0.32207000 |
| O                      | -0.83585700 | 2.16385900  | 0.81494500  |
| N                      | 0.82096100  | -0.57751600 | 1.94381000  |
| N                      | 2.26497000  | -1.43986600 | -0.46942200 |
| N                      | 2.30885000  | 1.35630200  | -0.33350600 |
| N                      | -1.34527100 | -1.21502100 | 0.34692400  |
| C                      | 1.49612700  | -1.89707500 | 1.85472200  |
| H                      | 0.75659500  | -2.62640400 | 1.51292200  |
| H                      | 1.84306500  | -2.22029200 | 2.84765900  |
| C                      | 2.67640000  | -1.88150600 | 0.88474200  |
| H                      | 3.44650900  | -1.19454300 | 1.24314000  |
| H                      | 3.13150600  | -2.88033800 | 0.84958700  |
| C                      | 1.74047300  | -2.52519700 | -1.31123200 |
| H                      | 1.12325200  | -3.18135200 | -0.68866300 |
| H                      | 2.54312000  | -3.13740000 | -1.74394900 |
| C                      | 3.33439500  | -0.69007100 | -1.15505300 |
| H                      | 3.06257100  | -0.60875400 | -2.21290600 |
| H                      | 4.29584800  | -1.21782500 | -1.10164000 |
| C                      | 3.46428000  | 0.70817100  | -0.59472600 |
| C                      | 4.70305600  | 1.30909400  | -0.37812400 |
| H                      | 5.61205500  | 0.75415000  | -0.58557100 |
| C                      | 4.74940300  | 2.61482800  | 0.11094600  |
| H                      | 5.70456000  | 3.09913400  | 0.28976900  |
| C                      | 3.55354500  | 3.28278900  | 0.37479900  |
| H                      | 3.54148300  | 4.29665700  | 0.75976100  |
| C                      | 2.35689800  | 2.61219900  | 0.14275100  |
| H                      | 1.40058400  | 3.08262100  | 0.34395900  |
| C                      | -2.18296300 | -1.82331300 | -0.51110000 |
| H                      | -1.99458700 | -1.64064400 | -1.56326100 |
| C                      | -3.22930100 | -2.63422900 | -0.08585600 |
| H                      | -3.88324200 | -3.10380800 | -0.81251700 |
| C                      | -3.40776600 | -2.82014600 | 1.28641500  |
| H                      | -4.21349800 | -3.44521500 | 1.65920900  |
| C                      | -2.52625800 | -2.20653100 | 2.17537100  |
| H                      | -2.61967100 | -2.34754500 | 3.24732100  |
| C                      | -1.49775200 | -1.41041700 | 1.66932400  |
| C                      | -0.50789500 | -0.71276700 | 2.57396200  |
| H                      | -0.87901300 | 0.29552900  | 2.78467100  |
| H                      | -0.44057400 | -1.24287900 | 3.53484100  |
| C                      | 1.62387400  | 0.39970900  | 2.70280700  |

|   |             |             |             |
|---|-------------|-------------|-------------|
| H | 1.12828600  | 1.37291400  | 2.66772700  |
| H | 2.61275200  | 0.50567700  | 2.25564600  |
| H | 1.74056700  | 0.09141900  | 3.75284300  |
| O | 0.34571700  | -0.81339200 | -2.29156200 |
| C | 0.82912100  | -2.00301800 | -2.43687600 |
| O | 0.58414400  | -2.76090200 | -3.39125700 |
| O | -2.01009100 | 1.96717900  | 1.12087100  |
| O | -3.11424400 | 2.89087900  | 0.09214100  |
| C | -3.73426200 | 1.97905600  | -0.80792600 |
| C | -4.75412900 | 2.90034000  | -1.51849100 |
| H | -5.29193100 | 2.30146800  | -2.26193300 |
| H | -5.47444900 | 3.30876400  | -0.80363200 |
| H | -4.24713100 | 3.72369100  | -2.03057300 |
| C | -4.46522600 | 0.86821600  | -0.04376400 |
| H | -5.00724300 | 0.22242200  | -0.74188400 |
| H | -3.75932100 | 0.24760100  | 0.51384900  |
| H | -5.18045100 | 1.30334100  | 0.66221400  |
| C | -2.71840400 | 1.42980200  | -1.81567700 |
| H | -2.24649600 | 2.25096400  | -2.36641900 |
| H | -1.93589900 | 0.86306000  | -1.30606600 |
| H | -3.20928700 | 0.76291600  | -2.53218300 |

tBuO•

|   |             |             |             |
|---|-------------|-------------|-------------|
| O | -0.00098600 | 0.27496700  | -1.43774600 |
| C | 0.00015600  | -0.02971200 | -0.07766100 |
| C | -0.00547400 | 1.38374300  | 0.58857700  |
| H | -0.90018900 | 1.94187100  | 0.30006100  |
| H | -0.00615000 | 1.23430800  | 1.67349500  |
| H | 0.88579200  | 1.94831700  | 0.30200300  |
| C | 1.27858100  | -0.78923000 | 0.31086600  |
| H | 1.30810300  | -1.75865800 | -0.19871200 |
| H | 2.16554400  | -0.21534400 | 0.02321900  |
| H | 1.30654700  | -0.96632600 | 1.39137100  |
| C | -1.27239500 | -0.79916900 | 0.31077100  |
| H | -2.16375800 | -0.23357000 | 0.02033300  |
| H | -1.29265500 | -1.76994200 | -0.19672200 |
| H | -1.30055300 | -0.97418000 | 1.39160200  |

tBu-O-O-O-O-tBu

|   |             |             |             |
|---|-------------|-------------|-------------|
| O | -0.39721800 | -0.59522600 | -0.42310200 |
| O | -1.37996300 | -0.46746300 | 0.61265200  |
| C | -2.64988100 | 0.03318000  | 0.06278800  |
| C | -3.52445500 | 0.06015700  | 1.31785000  |

|   |             |             |             |
|---|-------------|-------------|-------------|
| H | -3.11333400 | 0.74644400  | 2.06546600  |
| H | -4.52856600 | 0.40169800  | 1.04713000  |
| H | -3.60511000 | -0.93862800 | 1.75926600  |
| C | -3.18032100 | -0.95745700 | -0.97176100 |
| H | -2.51219000 | -1.01289700 | -1.83647100 |
| H | -3.27435600 | -1.95673000 | -0.53356700 |
| H | -4.16678000 | -0.63564000 | -1.32159200 |
| C | -2.46922600 | 1.43214100  | -0.52252300 |
| H | -2.02623300 | 2.10762900  | 0.21588600  |
| H | -1.82889200 | 1.40969000  | -1.40902800 |
| H | -3.44632200 | 1.82885400  | -0.81795600 |
| O | 0.39748600  | 0.59510300  | -0.42453400 |
| O | 1.38037100  | 0.47014200  | 0.61136300  |
| C | 2.64976900  | -0.03327100 | 0.06294800  |
| C | 3.52515400  | -0.05484800 | 1.31754600  |
| H | 3.11664000  | -0.74045500 | 2.06721000  |
| H | 4.53001400  | -0.39407900 | 1.04678800  |
| H | 3.60327200  | 0.94526300  | 1.75643500  |
| C | 3.17995200  | 0.95255200  | -0.97629000 |
| H | 2.51137100  | 1.00451000  | -1.84087700 |
| H | 3.27440600  | 1.95371300  | -0.54250900 |
| H | 4.16613300  | 0.62893800  | -1.32516200 |
| C | 2.46834900  | -1.43467600 | -0.51625400 |
| H | 2.02583700  | -2.10696500 | 0.22533000  |
| H | 1.82742600  | -1.41585900 | -1.40242500 |
| H | 3.44522900  | -1.83259900 | -0.81077000 |

## 2

|    |             |             |             |
|----|-------------|-------------|-------------|
| Mn | -0.00011200 | -0.03691400 | 0.81732900  |
| O  | 0.07136900  | -1.10420800 | 2.85348000  |
| N  | -0.29083800 | -1.60430100 | -0.92506400 |
| N  | 0.67661600  | 1.15663500  | -1.13725200 |
| N  | 2.37159800  | -0.13956600 | 0.67703000  |
| N  | -2.31087100 | -0.38034600 | 0.58101900  |
| C  | -0.43046300 | -0.81663400 | -2.17449700 |
| H  | -1.41547400 | -0.34207100 | -2.15778100 |
| H  | -0.40098900 | -1.47822200 | -3.05338300 |
| C  | 0.65121600  | 0.25430200  | -2.30931100 |
| H  | 1.63364600  | -0.21700400 | -2.39022600 |
| H  | 0.49009100  | 0.81753400  | -3.23936400 |
| C  | -0.31828200 | 2.23590200  | -1.20655200 |
| H  | -1.24295700 | 1.83396200  | -1.63353200 |
| H  | 0.00979700  | 3.06067700  | -1.85436600 |

|   |             |             |             |
|---|-------------|-------------|-------------|
| C | 2.02724900  | 1.68887200  | -0.88322200 |
| H | 1.93434500  | 2.51346500  | -0.16807600 |
| H | 2.47900400  | 2.09794300  | -1.79760700 |
| C | 2.92746000  | 0.63824000  | -0.27270200 |
| C | 4.26338200  | 0.49584800  | -0.64741600 |
| H | 4.67532200  | 1.13305600  | -1.42324500 |
| C | 5.04468900  | -0.47351000 | -0.01781300 |
| H | 6.08671800  | -0.60196400 | -0.29479700 |
| C | 4.46526100  | -1.28011000 | 0.96233400  |
| H | 5.03283800  | -2.05160100 | 1.47146700  |
| C | 3.12275800  | -1.08053800 | 1.27209400  |
| H | 2.62180100  | -1.69306100 | 2.01574100  |
| C | -3.25390300 | 0.49390700  | 0.96947600  |
| H | -2.91075500 | 1.31137400  | 1.59521400  |
| C | -4.58870100 | 0.37489400  | 0.59218300  |
| H | -5.31709800 | 1.10334000  | 0.93163300  |
| C | -4.95126600 | -0.68883800 | -0.23522100 |
| H | -5.98024200 | -0.81100900 | -0.55964600 |
| C | -3.96984600 | -1.58675800 | -0.65572500 |
| H | -4.21013000 | -2.41414000 | -1.31549000 |
| C | -2.65600400 | -1.40246000 | -0.22613400 |
| C | -1.53858500 | -2.33864500 | -0.62598600 |
| H | -1.32879400 | -3.01105900 | 0.21420000  |
| H | -1.85008500 | -2.96005900 | -1.47776500 |
| C | 0.83741500  | -2.55148600 | -0.99725400 |
| H | 0.95833600  | -3.03826800 | -0.02573500 |
| H | 1.76088300  | -2.01886700 | -1.22573900 |
| H | 0.66874000  | -3.31904300 | -1.76792700 |
| O | -0.40708100 | 2.05599700  | 1.20350600  |
| C | -0.68540700 | 2.79298200  | 0.18119600  |
| O | -1.25813800 | 3.89682200  | 0.23152900  |
| H | -0.64051600 | -0.71424800 | 3.39168700  |
| H | 0.89173500  | -0.82953700 | 3.30055400  |

tBuOH

|   |             |             |             |
|---|-------------|-------------|-------------|
| O | 0.07734300  | -0.00529500 | 1.45729900  |
| C | -0.00771200 | 0.00011900  | 0.01177200  |
| C | 0.65306400  | 1.27251800  | -0.53046700 |
| H | 1.71686300  | 1.29492100  | -0.26245300 |
| H | 0.57659400  | 1.32131100  | -1.62269200 |
| H | 0.17219700  | 2.16199400  | -0.10801800 |
| C | -1.50333200 | -0.01626000 | -0.30333300 |
| H | -1.97469900 | -0.91149700 | 0.11804400  |

|   |             |             |             |
|---|-------------|-------------|-------------|
| H | -1.99493200 | 0.86606100  | 0.12215600  |
| H | -1.66661300 | -0.01560900 | -1.38601200 |
| C | 0.68303400  | -1.25191800 | -0.54030200 |
| H | 1.74706400  | -1.25100400 | -0.27210200 |
| H | 0.22350900  | -2.15562600 | -0.12427800 |
| H | 0.60775300  | -1.29456800 | -1.63281300 |
| H | 1.02319900  | -0.00037400 | 1.68376100  |

O<sub>2</sub>

|   |            |            |             |
|---|------------|------------|-------------|
| O | 0.00000000 | 0.00000000 | 0.60662400  |
| O | 0.00000000 | 0.00000000 | -0.60662400 |

H<sub>2</sub>O

|   |            |             |             |
|---|------------|-------------|-------------|
| O | 0.00000000 | 0.00000000  | 0.12099200  |
| H | 0.00000000 | -0.75908000 | -0.48396800 |
| H | 0.00000000 | 0.75908000  | -0.48396800 |
